# Supplementary material for: An adaptive semi-Lagrangian advection model for transport of volcanic emissions in the atmosphere
Source: Copernicus journal article supplement (doi:10.5194/nhess-18-1517-2018), 2018-06-01
Supplement: Supplementary file 1 [file nhess-18-1517-2018-supplement.zip]

Archive with 4 entries (4 files):
- vel_models_sphericity_1_shape_1_aspect_1.png
- nhess-18-1517-2018-supplement-title-page.pdf
- vel_models_sphericity_1_shape_1_aspect_1_loglog.png
- adaptive_vs_uniform_withgrid.png
