# Supplementary material for: An adaptive semi-Lagrangian advection model for transport of volcanic emissions in the atmosphere
Source: Copernicus journal article supplement (doi:10.5194/nhess-18-1517-2018), 2018-06-01
Supplement: Supplementary file 1 [file nhess-18-1517-2018-supplement.zip › nhess-18-1517-2018-supplement-title-page.pdf]

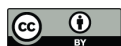

*Supplement of*

## **An adaptive semi-Lagrangian advection model for transport of volcanic emissions in the atmosphere**

**Elena Gerwing et al.**

*Correspondence to:* Elena Gerwing ([elena.gerwing@uni-hamburg.de](mailto:elena.gerwing@uni-hamburg.de))

- [nhess-18-1517-2018-supplement-title-page.pdf](#)
- [adaptive\\_vs\\_uniform\\_withgrid.png](#)
- [vel\\_models\\_sphericity\\_1\\_shape\\_1\\_aspect\\_1.png](#)
- [vel\\_models\\_sphericity\\_1\\_shape\\_1\\_aspect\\_1\\_loglog.png](#)

The copyright of individual parts of the supplement might differ from the CC BY 3.0 License.
