# Supplementary figures and images for: An adaptive semi-Lagrangian advection model for transport of volcanic emissions in the atmosphere
Source: Copernicus journal article supplement (doi:10.5194/nhess-18-1517-2018), 2018-06-01

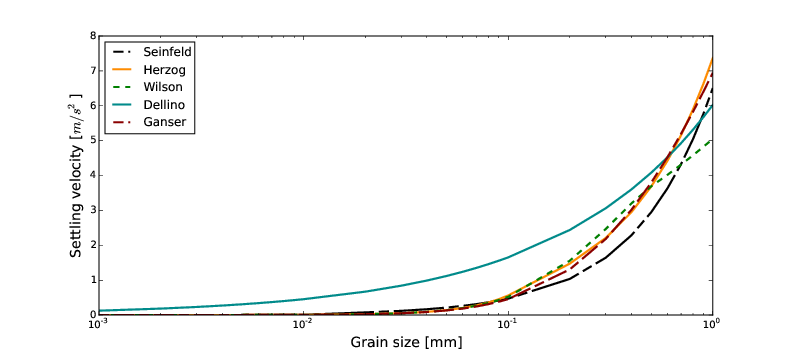

Supplement: Supplementary file 1 [file nhess-18-1517-2018-supplement.zip › vel_models_sphericity_1_shape_1_aspect_1.png]

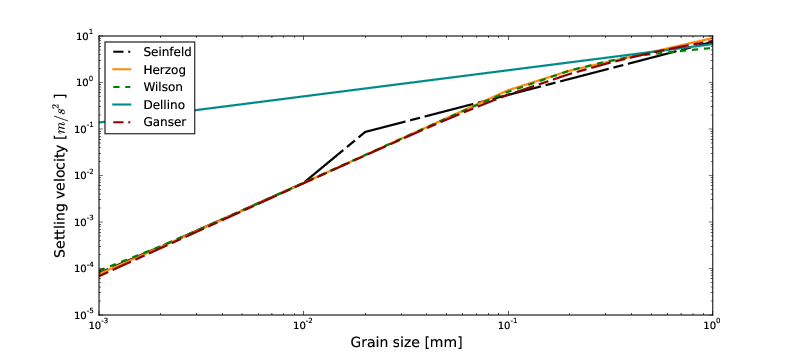

Supplement: Supplementary file 1 [file nhess-18-1517-2018-supplement.zip › vel_models_sphericity_1_shape_1_aspect_1_loglog.png]

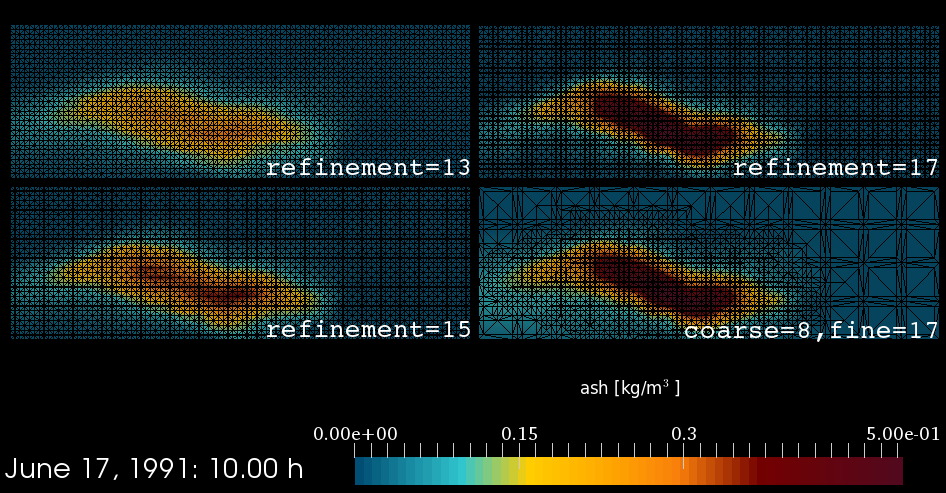

Supplement: Supplementary file 1 [file nhess-18-1517-2018-supplement.zip › adaptive_vs_uniform_withgrid.png]
